# Supplementary material for: Molecular Analysis of a Genetic Variants Panel Related to Nutrients and Metabolism: Association with Susceptibility to Gestational Diabetes and Cardiometabolic Risk in Affected Women
Source: Hindawi journal article supplement (doi:10.1155/2017/4612623), 2017-01-01
Supplement: f1 [file 4612623.f1.pdf]

**Supplementary Table 1. Genotypes distribution according to the presence of GDM (data are presented as percent %).**

|                                  | <b>GDM<br/>(N=102)</b> | <b>No GDM<br/>(N= 66)</b> | <b>P*</b> |
|----------------------------------|------------------------|---------------------------|-----------|
| <b><i>TCF7L2 rs7903146</i></b>   |                        |                           | 0.02*     |
| <b><i>CC</i></b>                 | 37.3                   | 51.5                      |           |
| <b><i>CT</i></b>                 | 35.3                   | 37.9                      |           |
| <b><i>TT</i></b>                 | 27.4                   | 10.6                      |           |
| <b><i>PPARG2 rs1801282</i></b>   |                        |                           | 0.79      |
| <b><i>CC</i></b>                 | 77.3                   | 75.5                      |           |
| <b><i>CG</i></b>                 | 22.7                   | 24.5                      |           |
| <b><i>GG</i></b>                 | 0.0                    | 0.0                       |           |
| <b><i>PPARGC1A rs8192678</i></b> |                        |                           | 0.33      |
| <b><i>CC</i></b>                 | 31.4                   | 31.8                      |           |
| <b><i>CT</i></b>                 | 52.9                   | 43.9                      |           |
| <b><i>TT</i></b>                 | 15.7                   | 24.3                      |           |
| <b><i>APOA5 rs662799</i></b>     |                        |                           | 0.22      |
| <b><i>TT</i></b>                 | 55.9                   | 66.7                      |           |
| <b><i>CT</i></b>                 | 38.2                   | 31.8                      |           |
| <b><i>CC</i></b>                 | 5.9                    | 1.5                       |           |
| <b><i>MC4R rs17782313</i></b>    |                        |                           | 0.23      |
| <b><i>TT</i></b>                 | 64.7                   | 63.6                      |           |
| <b><i>CT</i></b>                 | 28.4                   | 34.9                      |           |
| <b><i>CC</i></b>                 | 6.9                    | 1.5                       |           |
| <b><i>LDLR rs2228671</i></b>     |                        |                           | 0.92      |
| <b><i>CC</i></b>                 | 66.7                   | 68.2                      |           |
| <b><i>CT</i></b>                 | 32.4                   | 30.3                      |           |
| <b><i>TT</i></b>                 | 1.0                    | 1.5                       |           |
| <b><i>GCKR rs1260326</i></b>     |                        |                           | 0.94      |
| <b><i>CC</i></b>                 | 22.5                   | 22.7                      |           |
| <b><i>CT</i></b>                 | 56.9                   | 54.5                      |           |
| <b><i>TT</i></b>                 | 20.6                   | 22.7                      |           |
| <b><i>FTO rs9939609</i></b>      |                        |                           | 0.30      |
| <b><i>TT</i></b>                 | 32.4                   | 24.2                      |           |
| <b><i>AT</i></b>                 | 38.2                   | 50.0                      |           |
| <b><i>AA</i></b>                 | 29.4                   | 25.8                      |           |
| <b><i>MTHFR rs1801133</i></b>    |                        |                           | 0.53      |
| <b><i>CC</i></b>                 | 28.5                   | 34.8                      |           |
| <b><i>CT</i></b>                 | 48.0                   | 39.4                      |           |
| <b><i>TT</i></b>                 | 23.5                   | 25.8                      |           |
| <b>* Chi square test</b>         |                        |                           |           |

**Supplementary Table 2. 3<sup>rd</sup> trimester TC, HDL-C, LDL-C and TG levels of GDM patients according to carrier/no carrier (data are mean±SD).**

|                           | TC<br>mg/dl | P*   | HDL-C<br>mg/dl | P*    | LDL-C<br>mg/dl | P*    | TG<br>mg/dl | P*   |
|---------------------------|-------------|------|----------------|-------|----------------|-------|-------------|------|
| <i>TCF7L2 rs7903146</i>   |             | 0,80 |                | 0,39  |                | 0,54  |             | 0,45 |
| <b>CC</b>                 | 263±54      |      | 68±13          |       | 133±66         |       | 230±82      |      |
| <b>CT-TT</b>              | 263±53      |      | 72±17          |       | 130±58         |       | 237±72      |      |
| <i>PPARG2 rs1801282</i>   |             | 0,05 |                | 0,50  |                | 0,02* |             | 0,09 |
| <b>CC</b>                 | 270±54      |      | 70±15          |       | 137±60         |       | 242±76      |      |
| <b>CG-GG</b>              | 244±47      |      | 73±20          |       | 112±59         |       | 208±70      |      |
| <i>PPARGC1A rs8192678</i> |             | 0,43 |                | 0,28  |                | 0,96  |             | 0,43 |
| <b>CC</b>                 | 255±52      |      | 68±18          |       | 133±56         |       | 219±54      |      |
| <b>CT-TT</b>              | 268±54      |      | 72±15          |       | 125±63         |       | 239±83      |      |
| <i>APOA5 rs662799</i>     |             | 0,41 |                | 0,02* |                | 0,74  |             | 0,10 |
| <b>TT</b>                 | 258±52      |      | 74±17          |       | 132±55         |       | 222±71      |      |
| <b>CT-CC</b>              | 270±55      |      | 66±13          |       | 130±68         |       | 251±80      |      |
| <i>MC4R rs17782313</i>    |             | 0,41 |                | 0,03* |                | 0,92  |             | 0,21 |
| <b>TT</b>                 | 259±52      |      | 73±16          |       | 133±59         |       | 226±73      |      |
| <b>CT-CC</b>              | 269±55      |      | 65±14          |       | 129±65         |       | 249±79      |      |
| <i>LDLR rs2228671</i>     |             | 0,07 |                | 0,48  |                | 0,01* |             | 0,91 |
| <b>CC</b>                 | 269±51      |      | 72±17          |       | 146±52         |       | 234±79      |      |
| <b>CT-TT</b>              | 250±57      |      | 67±13          |       | 104±67         |       | 235±69      |      |
| <i>GCKR rs1260326</i>     |             | 0,38 |                | 0,12  |                | 0,54  |             | 0,23 |
| <b>CC</b>                 | 254±56      |      | 66±14          |       | 141±55         |       | 214±54      |      |
| <b>CT-TT</b>              | 266±52      |      | 72±16          |       | 128±62         |       | 241±81      |      |
| <i>FTO rs9939609</i>      |             | 0,88 |                | 0,11  |                | 0,02* |             | 0,60 |
| <b>TT</b>                 | 265±61      |      | 75±17          |       | 108±68         |       | 239±72      |      |
| <b>AT-AA</b>              | 262±50      |      | 69±15          |       | 142±54         |       | 232±78      |      |
| <i>MTHFR rs1801133</i>    |             | 0,51 |                | 0,87  |                | 0,50  |             | 0,57 |
| <b>CC</b>                 | 267±49      |      | 69±15          |       | 136±70         |       | 226±72      |      |
| <b>CT-TT</b>              | 261±55      |      | 71±16          |       | 130±59         |       | 237±77      |      |

\* Mann-Whitney U Test

**Supplementary Table 3. 3<sup>rd</sup> trimester TC, HDL-C, LDL-C and TG levels of GDM patients according to genotypes (data are mean±SD).**

|                                  | TC<br>mg/dl | P*    | HDL-C<br>mg/dl | P*    | LDL-C<br>mg/dl | P*    | TG<br>mg/dl | P*   |
|----------------------------------|-------------|-------|----------------|-------|----------------|-------|-------------|------|
| <b><i>TCF7L2 rs7903146</i></b>   |             | 0,68  |                | 0,67  |                | 0,42  |             | 0,69 |
| <b><i>CC</i></b>                 | 264±54      |       | 68±13          |       | 133±66         |       | 230±82      |      |
| <b><i>CT</i></b>                 | 270±59      |       | 72±18          |       | 139±59         |       | 242±80      |      |
| <b><i>TT</i></b>                 | 253±43      |       | 71±17          |       | 120±56         |       | 230±61      |      |
| <b><i>PPARG2 rs1801282</i></b>   |             | 0,05  |                | 0,50  |                | 0,02* |             | 0,09 |
| <b><i>CC</i></b>                 | 268±54      |       | 70±15          |       | 137±60         |       | 242±76      |      |
| <b><i>CG</i></b>                 | 244±47      |       | 73±20          |       | 112±59         |       | 209±71      |      |
| <b><i>GG</i></b>                 | 0.0         |       | 0.0            |       | 0.00           |       | 0.00        |      |
| <b><i>PPARGCIA rs8192678</i></b> |             | 0,72  |                | 0,56  |                | 0,37  |             | 0,69 |
| <b><i>CC</i></b>                 | 255±52      |       | 68±18          |       | 133±56         |       | 219±54      |      |
| <b><i>CT</i></b>                 | 268±59      |       | 72±16          |       | 125±69         |       | 239±84      |      |
| <b><i>TT</i></b>                 | 264±40      |       | 71±14          |       | 149±35         |       | 245±82      |      |
| <b><i>APOA5 rs662799</i></b>     |             | 0,317 |                | 0,05  |                | 0,34  |             | 0,12 |
| <b><i>TT</i></b>                 | 258±52      |       | 74±17          |       | 132±55         |       | 222±71      |      |
| <b><i>CT</i></b>                 | 274±56      |       | 66±14          |       | 135±68         |       | 243±75      |      |
| <b><i>CC</i></b>                 | 243±42      |       | 61±8           |       | 101±60         |       | 302±102     |      |
| <b><i>MC4R rs17782313</i></b>    |             | 0,375 |                | 0,02* |                | 0,69  |             | 0,35 |
| <b><i>TT</i></b>                 | 259±52      |       | 73 ±16         |       | 133±59         |       | 226±73      |      |
| <b><i>CT</i></b>                 | 266±57      |       | 63±13          |       | 126±69         |       | 256±85      |      |
| <b><i>CC</i></b>                 | 287±43      |       | 76±15          |       | 140±76         |       | 217±27      |      |
| <b><i>LDLR rs2228671</i></b>     |             | 0,18  |                | 0,36  |                | 0,02* |             | 0,67 |
| <b><i>CC</i></b>                 | 269±51      |       | 72±17          |       | 146±51         |       | 234±80      |      |
| <b><i>CT</i></b>                 | 251±58      |       | 67±13          |       | 104±68         |       | 237±70      |      |
| <b><i>TT</i></b>                 | 226±43      |       | 85±15          |       | 106±76         |       | 176±27      |      |
| <b><i>GCKR rs1260326</i></b>     |             | 0,65  |                | 0,30  |                | 0,61  |             | 0,33 |
| <b><i>CC</i></b>                 | 254±56      |       | 66±14          |       | 141±55         |       | 214±54      |      |
| <b><i>CT</i></b>                 | 264±50      |       | 73±17          |       | 123±67         |       | 234±75      |      |
| <b><i>TT</i></b>                 | 271±58      |       | 70±15          |       | 142±48         |       | 257±92      |      |
| <b><i>FTO rs9939609</i></b>      |             | 0,98  |                | 0,18  |                | 0,06  |             | 0,07 |
| <b><i>TT</i></b>                 | 265±61      |       | 75±17          |       | 108±68         |       | 239±72      |      |
| <b><i>AT</i></b>                 | 264±51      |       | 66±13          |       | 135±59         |       | 253±81      |      |
| <b><i>AA</i></b>                 | 260±51      |       | 17±18          |       | 150±48         |       | 211±69      |      |
| <b><i>MTHFR rs1801133</i></b>    |             | 0,46  |                | 0,81  |                | 0,15  |             | 0,85 |
| <b><i>CC</i></b>                 | 267±49      |       | 69±15          |       | 136±67         |       | 226±72      |      |
| <b><i>CT</i></b>                 | 266±57      |       | 70±16          |       | 140±59         |       | 237±81      |      |
| <b><i>TT</i></b>                 | 253±51      |       | 73±17          |       | 110±66         |       | 237±72      |      |

\* Kruskal-Wallis one-way ANOVA

**Supplementary Table 4. GDM and controls BMI in according to genotypes (data are mean±SD).**

|                                  |                  | <b>BMI</b> | <b>P*</b> |
|----------------------------------|------------------|------------|-----------|
| <i><b>TCF7L2 rs7903146</b></i>   | <i><b>CC</b></i> | 23,1±9,2   | 0,12      |
|                                  | <i><b>CT</b></i> | 24,8±7,3   |           |
|                                  | <i><b>TT</b></i> | 26,4±6,6   |           |
|                                  |                  |            |           |
| <i><b>PPARG2 rs1801282</b></i>   | <i><b>CC</b></i> | 24,9±7,1   | 0,28      |
|                                  | <i><b>CG</b></i> | 22,7±10,8  |           |
|                                  | <i><b>GG</b></i> |            |           |
|                                  |                  |            |           |
| <i><b>PPARGC1A rs8192678</b></i> | <i><b>CC</b></i> | 25,0±6,7   | 0,23      |
|                                  | <i><b>CT</b></i> | 23,2±9,2   |           |
|                                  | <i><b>TT</b></i> | 26,3±6,7   |           |
|                                  |                  |            |           |
| <i><b>APOA5 rs662799</b></i>     | <i><b>TT</b></i> | 24,5±8,5   | 0,93      |
|                                  | <i><b>CT</b></i> | 24,1±7,8   |           |
|                                  | <i><b>CC</b></i> | 25,0±6,1   |           |
|                                  |                  |            |           |
| <i><b>MC4R rs17782313</b></i>    | <i><b>TT</b></i> | 23,9±7,2   | 0,57      |
|                                  | <i><b>CT</b></i> | 25,0±9,9   |           |
|                                  | <i><b>CC</b></i> | 26,9±6,8   |           |
|                                  |                  |            |           |
| <i><b>LDLR rs2228671</b></i>     | <i><b>CC</b></i> | 24,3±7,9   | 0,21      |
|                                  | <i><b>CT</b></i> | 25,0±7,9   |           |
|                                  | <i><b>TT</b></i> | 11,0±15,5  |           |
|                                  |                  |            |           |
| <i><b>GCKR rs1260326</b></i>     | <i><b>CC</b></i> | 24,4±9,2   | 0,95      |
|                                  | <i><b>CT</b></i> | 24,1±8,3   |           |
|                                  | <i><b>TT</b></i> | 25,3±6,0   |           |
|                                  |                  |            |           |
| <i><b>FTO rs9939609</b></i>      | <i><b>TT</b></i> | 23,4±9,0   | 0,81      |
|                                  | <i><b>AT</b></i> | 24,8±7,1   |           |
|                                  | <i><b>AA</b></i> | 24,9±8,3   |           |
|                                  |                  |            |           |
| <i><b>MTHFR rs1801133</b></i>    | <i><b>CC</b></i> | 22,6±10,2  | 0,27      |
|                                  | <i><b>CT</b></i> | 25,2±6,6   |           |
|                                  | <i><b>TT</b></i> | 25,1±7,3   |           |
|                                  |                  |            |           |

\* Kruskal-Wallis one-way ANOVA

**Supplementary Table 5. GDM and controls BMI in according to carrier/no carrier (data are mean±SD).**

|                                                                             | <b>BMI</b>            | <b>P*</b> |
|-----------------------------------------------------------------------------|-----------------------|-----------|
| <i><b>TCF7L2 rs7903146</b></i><br><i><b>CC</b></i><br><i><b>CT-TT</b></i>   | 23,0±9,2<br>25,4±7,0  | 0,05      |
| <i><b>PPARG2 rs1801282</b></i><br><i><b>CC</b></i><br><i><b>CG-GG</b></i>   | 24,9±7,1<br>22,7±10,8 | 0,28      |
| <i><b>PPARGC1A rs8192678</b></i><br><i><b>CC</b></i><br><i><b>CT-TT</b></i> | 25,0±6,7<br>24,1±8,6  | 0,46      |
| <i><b>APOA5 rs662799</b></i><br><i><b>TT</b></i><br><i><b>CT-CC</b></i>     | 24,5±8,5<br>24,2±7,6  | 0,74      |
| <i><b>MC4R rs17782313</b></i><br><i><b>TT</b></i><br><i><b>CT-CC</b></i>    | 23,8±7,1<br>25,3±9,5  | 0,41      |
| <i><b>LDLR rs2228671</b></i><br><i><b>CC</b></i><br><i><b>CT-TT</b></i>     | 24,3±7,9<br>24,5±8,5  | 0,49      |
| <i><b>GCKR rs1260326</b></i><br><i><b>CC</b></i><br><i><b>CT-TT</b></i>     | 24,4±9,2<br>24,4±7,7  | 0,74      |
| <i><b>FTO rs9939609</b></i><br><i><b>TT</b></i><br><i><b>AT-AA</b></i>      | 23,4±9,0<br>24,8±7,6  | 0,86      |
| <i><b>MTHFR rs1801133</b></i><br><i><b>CC</b></i><br><i><b>CT-TT</b></i>    | 22,6±10,2<br>25,1±6,8 | 0,11      |
| <i><b>* Mann-Whitney U Test</b></i>                                         |                       |           |
